# Supplementary material
Source: publisher site journal article supplement (https://www.dovepress.com/article/463141)
Supplement: Supplementary file 1 [file get_supplementary_file.php]

SUPPORTING INFORMATION

# Size-Optimized Layered Double Hydroxide Nanoparticles Promote Neural Progenitor Cells Differentiation of Embryonic Stem Cells Through the Regulation of M6A Methylation

Yuxin Bai1,2, Yanjing Zhu1, Xiaolie He1, Ruiqi Huang1,2, Xu Xu1, Li Yang1, Zhaojie Wang1,2, *, Rongrong Zhu1,2, *

1 Key Laboratory of Spine and Spinal Cord Injury Repair and Regeneration of Ministry of Education, Department of Orthopedics, Tongji Hospital affiliated to Tongji University, School of Life Science and Technology, Tongji University, Shanghai 200065, China

2 Frontier Science Center for Stem Cell Research, Tongji University, Shanghai 200065, China

* Authors to whom any correspondence should be addressed.

Corresponding authors:

Zhaojie Wang, 2013wangzhaojie@tongji.edu.cn; Rongrong Zhu, rrzhu@tongji.edu.cn





**Figure S1.** The corresponding elemental peak of Mg, Al, N and O of MgFe-LDH with different sizes.





**Figure S2.** Quantitative analysis of SOX1, PAX6, N-CADHERIN and MAP2 protein expression in Figure 5B. The data are presented as the mean ± SD (n=3, ***p < 0.001, **p < 0.01, *p < 0.05, ns means there was no significant difference between the two groups).





**Figure S3.** The fluorescence intensity quantification of SOX1, PAX6 and N-CADHERIN expression in Figure 5C. The data are presented as the mean ± SD (n=3, ***p < 0.001, **p < 0.01, *p < 0.05, ns means there was no significant difference between the two groups).





**Figure S4.** Quantitative analysis of METTL3 protein expression in Figure 6B. The data are presented as the mean ± SD (n=3, **p < 0.01).





**Figure S5.** The fluorescence intensity quantification of SOX1, PAX6 and N-CADHERIN expression in Figure 7B. The data are presented as the mean ± SD (n=3, ***p < 0.001, *p < 0.05, ns means there was no significant difference between the two groups).

Table S1. The qPCR primer used in this work.

| Gene name | Forward primer (5’-3’) | Reverse primer (5’-3’) |
| --- | --- | --- |
| *Gapdh* | GTGTTCCTACCCCCAATGTGT | ATTGTCATACCAGGAAATGAGCTT |
| *Pax6* | TCTTTGCTTGGGAAATCCG | CTGCCCGTTCAACATCCTTAG |
| *N-cadherin* | TCCTGATATATGCCCAAGACAA | TGACCCAGTCTCTCTTCTGC |
| *Map2* | GGTCACAGGGCACCTATTCA | TGTTCACCTTTCAGGACTGC |
| *Sox1* | TTACTTCCCGCCAGCTCTTC | TGATGCATTTTGGGGGTATCTCTC |
| *Esrrb* | TGGCAGGCAAGGATGACAGA | TTTACATGAGGGCCGTGGGA |
| *Oct4* | GGATGCTGTGAGCCAAGG | GAACAAAATGATGAGTGACAGACAG |
| *Rex1* | GGAAGAAATGCTGAAGGTGGAGAC | AGTCCCCATCCCCTTCAATAGC |
| *Nanog* | CTCATCAATGCCTGCAGTTTTTCA | CTCCTCAGGGCCCTTGTCAGC |
| *Nestin* | CTGCAGGCCACTGAAAAGTT | GACCCTGCTTCTCCTGCTC |
| *Tuj1* | TAGACCCCAGCGGCAACTAT | GTTCCAGGTTCCAAGTCCACC |
| *Eomes* | CCTGGTGGTGTTTTGTTGTG | TTTAATAGCACCGGGCACTC |
| *T* | GGTGGCTTGTTCCTGGTGC | GTAGGTGGGCTGGCGTTAT |
| *Sox17* | CGAGCCAAAGCGGAGTCTC | TGCCAAGGTCAACGCCTTC |
| *Cxcr4* | TCCAACAAGGAACCCTGCTTC | TTGCCGACTATGCCAGTCAAG |
| *Mettl3* | ATCCAGGCCCATAAGAAACAG | CTATCACTACGGAAGGTTGGG |

**Table S2.** Sequences of possible sites of Sox1 mRNA with m6A modification

| Position | Sequence context | Score (combined) | Decision |
| --- | --- | --- | --- |
| 326 | UGGCU CCCCC CAGGC  ACCUG GGACC AGCAC  AUGCC CAGCG CACGC | 0.539 | m6A site (Low confidence) |
| 420 | GGAAG CCAGC ACAGG  AACGG AGACU UCGAG  CCGAC AAGAG GAGGC | 0.598 | m6A site (Moderate confidence) |
| 1160 | CGUUC AUCGA CGAGG  CCAAG AGACU GCGCG  CGCUG CACAU GAAGG | 0.954 | m6A site (Very high confidence) |
| 1240 | ACCAA GACGC UGCUC  AAGAA GGACA AGUAC  UCGCU GGCCG GCGGG | 0.608 | m6A site (High confidence) |
| 1723 | GCUGC GGGCG GCGCG  CACCA GAACU CGGCG  GUGGC GGCAG CGGCA | 0.561 | m6A site (Moderate confidence) |
| 2038 | UAGCG CCGCG GGGAC  GCCGG GGACA CUGCG  GCUUA AGGCC GGCGC | 0.617 | m6A site (High confidence) |
| 2169 | CUGGA GAGCC GAGCG  CCAGG UGACA UCUGC  CCCCA UCACC UUCCC | 0.928 | m6A site (Very high confidence) |
| 2196 | UGCCC CCAUC ACCUU  CCCCA GGACU CCGAG  GCGCU GACAC CAGAC | 0.948 | m6A site (Very high confidence) |
| 2217 | GACUC CGAGG CGCUG  ACACC AGACU GGCCU  CUUAG ACUGA ACUUU | 0.924 | m6A site (Very high confidence) |
| 2230 | UGACA CCAGA CUGGC  CUCUU AGACU GAACU  UUGGU GUUUU CAUGA | 0.927 | m6A site (Very high confidence) |
|  |  |  |  |
| 2235 | CCAGA CUGGC CUCUU  AGACU GAACU UUGGU  GUUUU CAUGA GACCU | 0.939 | m6A site (Very high confidence) |
| 2254 | UGAAC UUUGG UGUUU  UCAUG AGACC UUUUG  UACAG UAUUU AUCGU | 0.891 | m6A site (Very high confidence) |
| 2316 | AGCGU UUUCU CGGCU  UCGGA GGACA AAAGA  CAAAA ACCCA GCGAG | 0.573 | m6A site (Moderate confidence) |
| 3803 | UCUUU UCUUG GAAUG  AAUAU GGACU AGCCA  UUCAA AAGUG GACUU | 0.583 | m6A site (Moderate confidence) |
| 3822 | UGGAC UAGCC AUUCA  AAAGU GGACU UAAUC  UAGCA AUUCA GUAAG | 0.607 | m6A site (High confidence) |

**Table S3**. Sequences of possible sites of *Pax6* mRNA with m6A modification.

| Position | Sequence context | Score (combined) | Decision |
| --- | --- | --- | --- |
| 124 | GUGUG GGAAC CAGCG  CCACC AGACU CACCU  GACAC CCCAC CCUCG | 0.562 | m6A site (Moderate confidence) |
| 162 | ACCCU CGGCU CACAG  GCAGA AGACU UUAAC  CAAGG GCGGU GAGCA | 0.624 | m6A site (High confidence) |
| 293 | CCAAC CAGCU CCAGC  AUGCA GAACA GUCAC  AGCGG AGUGA AUCAG | 0.562 | m6A site (Moderate confidence) |
| 353 | GUCAA CGGGC GGCCA  CUGCC GGACU CCACC  CGGCA GAAGA UCGUA | 0.691 | m6A site (Very high confidence) |
| 458 | GAUGC AAAAG UCCAG  GUGCU GGACA AUGAA  AACGU AUCCA ACGGU | 0.700 | m6A site (Very high confidence) |
| 514 | AAUUC UGGGC AGGUA  UUACG AGACU GGCUC  CAUCA GACCC AGGGC | 0.564 | m6A site (Moderate confidence) |
| 762 | GCGCA GACGG CAUGU  AUGAU AAACU AAGGA  UGUUG AACGG GCAGA | 0.543 | m6A site (Low confidence) |
| 823 | ACGCC CUGGU UGGUA  UCCCG GGACU UCAGU  ACCAG GGCAA CCCAG | 0.709 | m6A site (Very high confidence) |
| 864 | CAACA GGAAG GAGGG  GGAGA GAACA CCAAC  UCCAU CAGUU CUAAC | 0.536 | m6A site (Low confidence) |
| 914 | UCCAU CAGUU CUAAC  GGAGA AGACU CGGAU  GAAGC UCAGA UGCGA | 0.635 | m6A site (High confidence) |
|  |  |  |  |
|  |  |  |  |
| 970 | GCGGA AGCUG CAAAG  AAAUA GAACA UCUUU  UACCC AAGAG CAGAU | 0.554 | m6A site (Low confidence) |
| 1021 | UCUGG AGAAA GAGUU  UGAGA GGACC CAUUA  UCCAG AUGUG UUUGC | 0.556 | m6A site (Low confidence) |
| 1053 | CAGAU GUGUU UGCCC  GGGAA AGACU AGCAG  CCAAA AUAGA UCUAC | 0.699 | m6A site (Very high confidence) |
| 1137 | CCAAA UGGAG AAGAG  AAGAG AAACU GAGGA  ACCAG AGAAG ACAGG | 0.633 | m6A site (High confidence) |
| 1155 | AGAAA CUGAG GAACC  AGAGA AGACA GGCCA  GCAAC ACUCC UAGUC | 0.547 | m6A site (Low confidence) |
| 1472 | CCGCA CAUGC AAACA  CACAU GAACA GUCAG  CCCAU GGGCA CCUCG | 0.620 | m6A site (High confidence) |
| 1490 | UCAGC CCAUG GGCAC  CUCGG GGACC ACUUC  AACAG GACUC AUUUC | 0.561 | m6A site (Moderate confidence) |
| 1512 | CCUCG GGGAC CACUU  CAACA GGACU CAUUU  CACCU GGAGU GUCAG | 0.668 | m6A site (High confidence) |
| 1653 | AAUUG UGUUC ACUCU  GCCAA UGACU AUGUG  GACAC AGCAG UUGGG | 0.631 | m6A site (High confidence) |
| 1662 | CACUC UGCCA AUGAC  UAUGU GGACA CAGCA  GUUGG GUAUU CAGGA | 0.623 | m6A site (High confidence) |
| 1734 | CUUCA CUUUG UAACU  GUCCU GAACU GGAGC  CCGGG AAUGG ACUAG | 0.670 | m6A site (High confidence) |
| 1752 | CUGAA CUGGA GCCCG  GGAAU GGACU AGAAC  CAAGG ACCUU UGCGU | 0.700 | m6A site (Very high confidence) |
|  |  |  |  |
| 1765 | CGGGA AUGGA CUAGA  ACCAA GGACC UUUGC  GUACA GAAGG CACGG | 0.647 | m6A site (High confidence) |
| 2027 | CCCAU CUGUU CAUAG  UUUAU GGACU GAUGU  UCCAA GUUUG UAUCA | 0.568 | m6A site (Moderate confidence) |
| 3207 | CUAAG AGACA ACAAC  AAAGC GGACU GUGAC  UGGCC GGUGG GAGUU | 0.596 | m6A site (Moderate confidence) |
| 3543 | CCUAG AUUAA AAAUA  CAAGG AGACU CAUCC  UAGGG GGAAG GCACU | 0.575 | m6A site (Moderate confidence) |
